# Supplementary material for: β-amyloid pathology and hippocampal atrophy are independently associated with memory function in cognitively healthy elderly
Source: PubMed Central journal article supplement (PMC6671981; doi:10.1038/s41598-019-47638-y), 2019-08-01
Supplement: 41598_2019_47638_MOESM1_ESM.pdf [file 41598_2019_47638_MOESM1_ESM.pdf]

**$\beta$ -amyloid pathology and hippocampal atrophy are independently associated with memory function in cognitively healthy elderly**

Anna L. Svenningsson, MD,<sup>1,2\*</sup> Erik Stomrud, MD, PhD,<sup>1,2</sup> Philip S. Insel, MS,<sup>1</sup> Niklas Mattsson, MD, PhD,<sup>1,3</sup> Sebastian Palmqvist, MD, PhD,<sup>1,3</sup>† Oskar Hansson, MD, PhD<sup>1,2</sup>†.

<sup>1</sup> Clinical Memory Research Unit, Department of Clinical Sciences, Lund University, Lund/Malmö, Sweden. <sup>2</sup> Memory Clinic, Skåne University Hospital, Malmö, Sweden. <sup>3</sup> Department of Neurology, Skåne University Hospital, Lund University, Lund, Sweden.

\*Corresponding author. †Both contributed as senior authors.

### Supplementary information

|                                      | A $\beta$ negative, n (%) | A $\beta$ positive, n (%) |
|--------------------------------------|---------------------------|---------------------------|
| Cognitively unimpaired (n=325)       | 266 (82)                  | 59 (18)                   |
| Subjective cognitive decline (n=204) | 144 (71)                  | 60 (29)                   |
| Mild cognitive impairment (n=276)    | 137 (50)                  | 139 (50)                  |
| Dementia (n=84)                      | 8 (10)                    | 76 (90)                   |

**Supplementary table 1. Proportion of A $\beta$  negative and positive subjects.** Number and proportion of A $\beta$  negative and positive subjects in the in the sample used for mixture modelling. Abbreviations: A $\beta$ , amyloid- $\beta$ .

| Included variables                    | A $\beta$ pathology       | HV                       | Temporal cx              | Frontal cx               | Adjusted R <sup>2</sup> |
|---------------------------------------|---------------------------|--------------------------|--------------------------|--------------------------|-------------------------|
| All variables included                | <b>-0.14</b><br>(p=0.010) | <b>0.25</b><br>(p<0.001) | 0.044<br>(p=0.72)        | 0.042<br>(p=0.71)        | 0.119                   |
| A $\beta$ , HV and temporal cx        | <b>-0.14</b><br>(p=0.010) | <b>0.25</b><br>(p=0.001) | 0.082<br>(p=0.22)        | -                        | 0.122                   |
| A $\beta$ , HV and frontal cx         | <b>-0.14</b><br>(p=0.010) | <b>0.25</b><br>(p<0.001) | -                        | 0.076<br>(p=0.22)        | 0.122                   |
| A $\beta$ and frontal and temporal cx | <b>-0.14</b><br>(p=0.015) | -                        | 0.14 (p=0.25)            | 0.019<br>(p=0.87)        | 0.089                   |
| HV and frontal and temporal cx        | -                         | <b>0.24</b><br>(p=0.001) | 0.051<br>(p=0.68)        | 0.040<br>(p=0.72)        | 0.102                   |
| A $\beta$ and HV                      | <b>-0.14</b><br>(p=0.009) | <b>0.28</b><br>(p<0.001) | -                        | -                        | 0.121                   |
| A $\beta$ and temporal cx             | <b>-0.14</b><br>(p=0.014) | -                        | <b>0.16</b><br>(p=0.016) | -                        | 0.092                   |
| A $\beta$ and frontal cx              | <b>-0.14</b><br>(p=0.014) | -                        | -                        | <b>0.13</b><br>(p=0.033) | 0.088                   |
| HV and temporal cx                    | -                         | <b>0.24</b><br>(p=0.001) | 0.087<br>(p=0.20)        | -                        | 0.105                   |
| HV and frontal cx                     | -                         | <b>0.25</b><br>(p<0.001) | -                        | 0.080<br>(p=0.21)        | 0.105                   |
| Temporal and frontal cx               | -                         | -                        | 0.15 (p=0.24)            | 0.018<br>(p=0.88)        | 0.073                   |
| A $\beta$                             | <b>-0.14</b><br>(p=0.013) | -                        | -                        | -                        | 0.077                   |
| HV                                    | -                         | <b>0.27</b><br>(p<0.001) | -                        | -                        | 0.103                   |
| Temporal cx                           | -                         | -                        | <b>0.16</b><br>(p=0.014) | -                        | 0.076                   |
| Frontal cx                            | -                         | -                        | -                        | <b>0.13</b><br>(p=0.031) | 0.072                   |

**Supplementary table 2. Multiple linear regressions.** Multivariable linear regression models, with ADAS-Cog delayed recall as dependent variable, including all or subsets of the different independent variables (A $\beta$ , HV, and temporal and frontal cortical thickness), controlling for age, sex, education, and ICV. Standardized beta coefficients with p values as well as adjusted R<sup>2</sup> values for each model are presented. Abbreviations: A $\beta$ , amyloid- $\beta$ ; HV, hippocampal volume; cx, cortex.

|                      | All          |                  | Younger      |              | Older        |                  |
|----------------------|--------------|------------------|--------------|--------------|--------------|------------------|
|                      | $\beta$      | p                | $\beta$      | p            | $\beta$      | p                |
| Age                  | -0.082       | 0.20             | -0.037       | 0.64         | 0.071        | 0.43             |
| Sex                  | 0.12         | 0.090            | <b>0.20</b>  | <b>0.031</b> | 0.047        | 0.66             |
| Education            | 0.086        | 0.12             | <b>0.22</b>  | <b>0.004</b> | -0.033       | 0.68             |
| Intracranial volume  | <b>-0.19</b> | <b>0.014</b>     | -0.16        | 0.098        | <b>-0.24</b> | <b>0.046</b>     |
| A $\beta$ positivity | <b>-0.14</b> | <b>0.009</b>     | <b>-0.23</b> | <b>0.003</b> | -0.069       | 0.38             |
| Hippocampal volume   | <b>0.28</b>  | <b>&lt;0.001</b> | 0.16         | 0.066        | <b>0.40</b>  | <b>&lt;0.001</b> |
| R <sup>2</sup>       | 0.138        |                  | 0.189        |              | 0.131        |                  |

**Supplementary table 3. Age-dependent effects of amyloid pathology and hippocampal volume on memory function.** Multivariable linear regression models, with ADAS-Cog delayed recall as dependent variable. Standardized beta coefficients with p values as well as R<sup>2</sup> values for each model are presented. Results are presented for the entire group and the younger and older half, respectively. Abbreviations: A $\beta$ , amyloid- $\beta$ .

|                      | $\beta$      | p                |
|----------------------|--------------|------------------|
| Age                  | -0.052       | 0.50             |
| Sex                  | <b>0.26</b>  | <b>&lt;0.001</b> |
| Education            | <b>0.22</b>  | <b>0.004</b>     |
| A $\beta$ positivity | -0.15        | 0.079            |
| P-tau                | <b>-0.17</b> | <b>0.045</b>     |
| R <sup>2</sup>       | 0.184        |                  |

**Supplementary table 4. P-tau is associated with memory in the younger group.** Multivariable linear regression in only the younger half of the subjects (n=150), with ADAS-Cog delayed recall as dependent variable. Standardized beta coefficients with p values as well as the R<sup>2</sup> value for the whole model are presented. Abbreviations: A $\beta$ , amyloid- $\beta$ .

|                      | $\beta$     | p                |
|----------------------|-------------|------------------|
| Age                  | 0.073       | 0.34             |
| Sex                  | 0.032       | 0.67             |
| A $\beta$ positivity | <b>0.39</b> | <b>&lt;0.001</b> |
| R <sup>2</sup>       | 0.161       |                  |

**Supplementary table 5. A $\beta$  positivity is associated with higher p-tau in the younger group.** Multivariable linear regression in only the younger half of the subjects (n=150), with p-tau as dependent variable. Standardized beta coefficients with p values as well as the R<sup>2</sup> for the whole model are presented. Abbreviations: A $\beta$ , amyloid- $\beta$ .

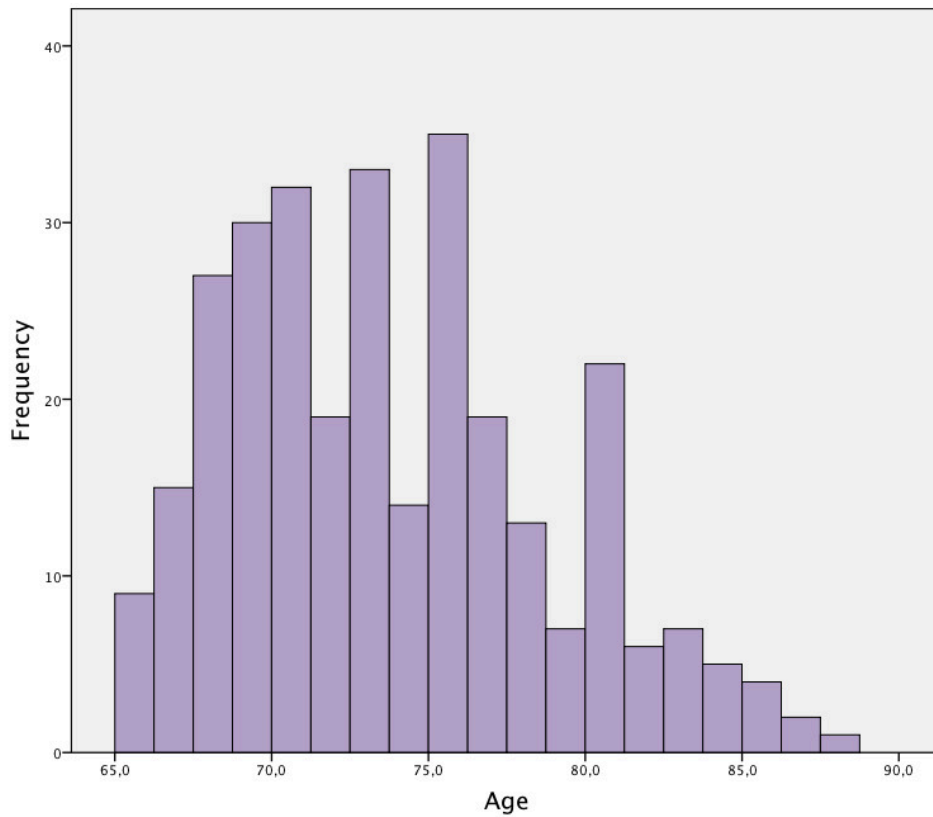

**Supplementary Figure 1. Age distribution in the study sample.** Histogram displaying the age distribution in the study sample (n=300).

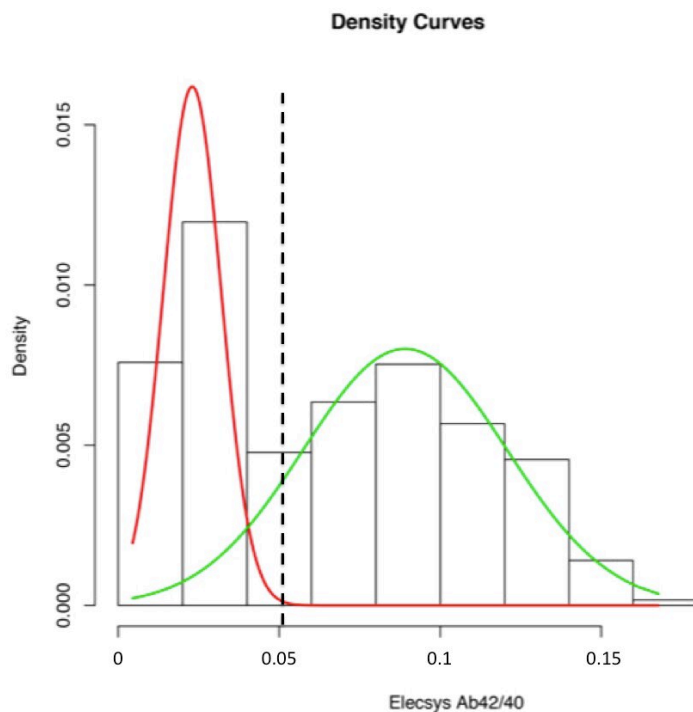

**Supplementary Figure 2. Distribution the Aβ42/40 ratio for defining the Aβ42/40 cutoff.** Histogram displaying the distribution of Aβ42/40 ratio in the sample used for the mixture modelling (n=889). Dashed line showing the calculated cut-off for the Aβ42/40 ratio.
